# Supplementary material for: A Systematic Review of the Evidence of Hematopoietic Stem Cell Differentiation to Fibroblasts
Source: MDPI journal article supplement (doi:10.3390/biomedicines10123063), 2022-11-28
Supplement: s1 [file s1]

## PubMed Session Results (28 Sep 2022)

| Search | Query                                                                                                                                                                                                                                                                                                                                                                                                                                                                             | Items found |
|--------|-----------------------------------------------------------------------------------------------------------------------------------------------------------------------------------------------------------------------------------------------------------------------------------------------------------------------------------------------------------------------------------------------------------------------------------------------------------------------------------|-------------|
| #4     | #1 AND #2 AND #3                                                                                                                                                                                                                                                                                                                                                                                                                                                                  | 2,585       |
| #3     | "Cells/etiology"[Mesh] OR "Cell Lineage"[Mesh] OR ("cell"[tiab] OR "cells"[tiab] OR "cellular"[tiab] OR "intercellular"[tiab] OR "peripheral"[tiab] OR "fibroblast*"[tiab] OR "bone marrow"[tiab]) AND ("derive*"[tiab] OR "deriv*"[tiab] OR "origin*"[tiab] OR "source"[tiab] OR "progenitor*"[tiab] OR "provenance"[tiab] OR "root"[tiab] OR "rooted"[tiab] OR "chimer*"[tiab] OR "germ line*"[tiab] OR "lineage*"[tiab]))                                                      | 1,688,309   |
| #2     | "Stem Cell Transplantation"[Mesh:NoExp] OR "Hematopoietic Stem Cell Transplantation"[Mesh] OR "Bone Marrow Transplantation"[Mesh] OR ("bone marrow"[tiab] OR "hematopoietic"[tiab] OR "hematopoietic"[tiab]) AND ("transplant*"[tiab] OR "graft*"[tiab] OR "transfus*"[tiab] OR "transfer*"[tiab]) OR "Genetic Heterogeneity"[Mesh] OR "genetic heterogeneity*"[tiab] OR "genetic hetero-geneit*"[tiab] OR "fibroblast heterogeneity*"[tiab] OR "fibroblast hetero-geneit*"[tiab] | 184,841     |
| #1     | "Fibroblasts"[Mesh] OR "fibroblast*"[tiab] OR "myofibroblast*"[tiab]                                                                                                                                                                                                                                                                                                                                                                                                              | 353,023     |

## Embase.com Session Results (28 Sep 2022)

| Search | Query                                                                                                                                                                                                                                                                                                                                                                                                                                     | Items found |
|--------|-------------------------------------------------------------------------------------------------------------------------------------------------------------------------------------------------------------------------------------------------------------------------------------------------------------------------------------------------------------------------------------------------------------------------------------------|-------------|
| #5     | #4 NOT ('conference abstract'/it OR 'conference review'/it)                                                                                                                                                                                                                                                                                                                                                                               | 3,197       |
| #4     | #1 AND #2 AND #3                                                                                                                                                                                                                                                                                                                                                                                                                          | 4,268       |
| #3     | ('cells'/exp AND 'etiology'/lnk) OR 'cell lineage'/exp OR (('cell':ab,ti,kw OR 'cells':ab,ti,kw OR 'cellular':ab,ti,kw OR 'intercellular':ab,ti,kw OR 'peripheral':ab,ti,kw OR 'fibroblast*':ab,ti,kw OR 'bone marrow':ab,ti,kw) AND ('derive*':ab,ti,kw OR 'deriv*':ab,ti,kw OR 'origin*':ab,ti,kw OR 'source':ab,ti,kw OR 'progenitor*':ab,ti,kw OR 'provenance':ab,ti,kw OR 'root':ab,ti,kw OR 'rooted':ab,ti,kw OR 'chimer*':ab,ti,kw | 1,885,088   |

| Search | Query                                                                                                                                                                                                                                                                                                                                                                                                                                                                                                                            | Items found |
|--------|----------------------------------------------------------------------------------------------------------------------------------------------------------------------------------------------------------------------------------------------------------------------------------------------------------------------------------------------------------------------------------------------------------------------------------------------------------------------------------------------------------------------------------|-------------|
|        | OR 'germ line'/exp OR 'germ line*':ab,ti,kw OR 'lineage*':ab,ti,kw))                                                                                                                                                                                                                                                                                                                                                                                                                                                             |             |
| #2     | 'stem cell transplantation'/de OR 'hematopoietic stem cell transplantation'/exp OR 'bone marrow transplantation'/exp OR (('bone marrow':ab,ti,kw OR 'hematopoietic':ab,ti,kw OR 'hematopoietic':ab,ti,kw) AND ('transplant*':ab,ti,kw OR 'graft*':ab,ti,kw OR 'transfus*':ab,ti,kw OR 'transfer*':ab,ti,kw)) OR 'genetic heterogeneity'/de OR 'cell heterogeneity'/exp OR 'genetic heterogeneity*':ab,ti,kw OR 'genetic heterogeneity*':ab,ti,kw OR 'fibroblast heterogeneity*':ab,ti,kw OR 'fibroblast heterogeneity*':ab,ti,kw | 321,780     |
| #1     | 'fibroblast'/exp OR 'fibroblast*':ab,ti,kw OR 'myofibroblast*':ab,ti,kw                                                                                                                                                                                                                                                                                                                                                                                                                                                          | 354,020     |

## Web of Science (Core Collection) Session Results (28 Sep 2022)

| Search | Query                                                                                                                                                                                                                                                                | Items found |
|--------|----------------------------------------------------------------------------------------------------------------------------------------------------------------------------------------------------------------------------------------------------------------------|-------------|
| #4     | #1 AND #2 AND #3                                                                                                                                                                                                                                                     | 2,696       |
| #3     | TS= (("cell" OR "cells" OR "cellular" OR "intercellular" OR "peripheral" OR "fibroblast*" OR "bone marrow") AND ("derive*" OR "derivi*" OR "origin*" OR "source" OR "progenitor*" OR "provenance" OR "root" OR "rooted" OR "chimer*" OR "germ line*" OR "lineage*")) | 1,221,108   |
| #2     | TS= ((( "bone marrow" OR "hematopoietic" OR "hematopoietic") AND ("transplant*" OR "graft*" OR "transfus*" OR "transfer*")) OR "genetic heterogeneity*" OR "genetic heterogeneity*" OR "fibroblast heterogeneity*" OR "fibroblast heterogeneity*")                   | 174,999     |
| #1     | TS= ("fibroblast*" OR "myofibroblast*")                                                                                                                                                                                                                              | 315,514     |
